# Supplementary material for: Protective Effect and Mechanism of Boswellic Acid and Myrrha Sesquiterpenes with Different Proportions of Compatibility on Neuroinflammation by LPS-Induced BV2 Cells Combined with Network Pharmacology
Source: PubMed Central journal article supplement (PMC6864549; doi:10.3390/molecules24213946), 2019-10-31
Supplement: molecules-24-03946-s001.pdf [file molecules-24-03946-s001.pdf]

Figure.S1 the ion flow chromatogram of the mixed reference material on the left and the ion flow chromatogram of the sample on the right.

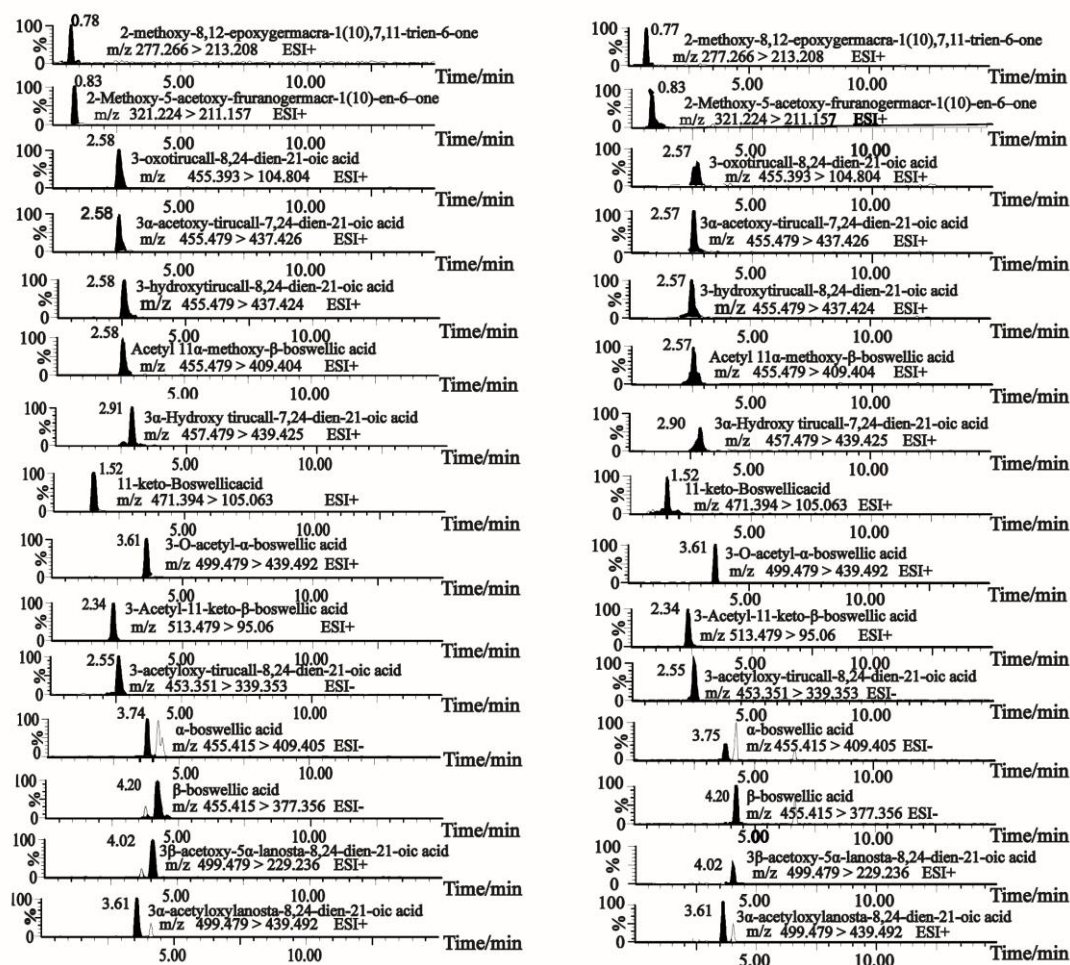

Table.S1 MRM transition, cone voltage, collision energy and ion mode of 15 investigated compounds

| (NO.) | compound                                            | MW  | (MRM transition)m/z | (cone voltage)/V | (collision energy)/eV | (ion mode)       |
|-------|-----------------------------------------------------|-----|---------------------|------------------|-----------------------|------------------|
| 1     | 2-methoxy-8,12-epoxygermacra-1(10),7,11-trien-6-one | 277 | 277.266→213.208     | 8                | 14                    | ESI <sup>+</sup> |
| 2     | 2-methoxy-5-acetoxy-fruranogermacr-1(10)-en-6-one   | 320 | 321.224→229.17      | 12               | 12                    | ESI <sup>+</sup> |
| 3     | 3-oxotirucall-8,24-dien-21-oic acid                 | 453 | 453.393→104.804     | 70               | 32                    | ESI <sup>+</sup> |
| 4     | 3α-acetoxy-tirucall-7,24-dien-21-oic acid           | 454 | 455.479→437.426     | 14               | 8                     | ESI <sup>+</sup> |
| 5     | 3-hydroxytirucall-8,24-dien-21-oic acid             | 454 | 455.479→437.424     | 14               | 14                    | ESI <sup>+</sup> |
| 6     | acetyl 11α-methoxy-β-boswellic acid                 | 454 | 455.479→409.404     | 16               | 22                    | ESI <sup>+</sup> |
| 7     | 3α-hydroxy tirucall-7,24-dien-21-oic acid           | 456 | 457.479→439.425     | 18               | 12                    | ESI <sup>+</sup> |
| 8     | 11-keto-boswellic acid                              | 471 | 471.394→105.063     | 60               | 36                    | ESI <sup>+</sup> |

|    |                                                              |     |                 |    |    |                  |
|----|--------------------------------------------------------------|-----|-----------------|----|----|------------------|
| 9  | 3-O-acetyl- $\alpha$ -boswellic acid                         | 498 | 499.479→439.492 | 55 | 22 | ESI <sup>+</sup> |
| 10 | 3 $\alpha$ -acetyloxylanosta-8,24-dien-21-oic acid           | 498 | 499.479→439.492 | 54 | 34 | ESI <sup>+</sup> |
| 11 | 3 $\beta$ -acetoxy-5 $\alpha$ -lanosta-8,24-dien-21-oic acid | 498 | 499.479→229.236 | 54 | 32 | ESI <sup>+</sup> |
| 12 | 3-acetyl-11-keto- $\beta$ -boswellic acid                    | 512 | 513.479 → 95.06 | 40 | 42 | ESI <sup>+</sup> |
| 13 | 3-acetyloxy-tirucall-8,24-dien-21-oic acid                   | 454 | 453.354→339.353 | 70 | 30 | ESI <sup>-</sup> |
| 14 | $\alpha$ -boswellic acid                                     | 456 | 455.415→409.405 | 50 | 22 | ESI <sup>-</sup> |
| 15 | $\beta$ -boswellic acid                                      | 456 | 455.415→377.356 | 44 | 30 | ESI <sup>-</sup> |

Table.S2 Linear regression data

| NO. | compound                                                     | regression equation    | <i>r</i> | (linear range)/<br>$\mu\text{g/mL}$ |
|-----|--------------------------------------------------------------|------------------------|----------|-------------------------------------|
| 1   | 2-methoxy-8,12-epoxygermacra-1(10),7,11-trien-6-one          | $y = 0.3588x - 0.2075$ | 0.9889   | 0.0890~11.40                        |
| 2   | 2-methoxy-5-acetoxy-fruranogermacr-1(10)-en-6-one            | $y = 93.028x + 24.451$ | 0.9982   | 0.1750~11.30                        |
| 3   | 3-oxotirucall-8,24-dien-21-oic acid                          | $y = 91.974x + 33.939$ | 0.9995   | 0.4090~13.10                        |
| 4   | 3 $\alpha$ -acetoxy-tirucall-7,24-dien-21-oic acid           | $y = 209.62x + 113.46$ | 0.9974   | 0.1328~17.00                        |
| 5   | 3-hydroxytirucall-8,24-dien-21-oic acid                      | $y = 497.05x + 85.839$ | 0.9909   | 0.3187~20.40                        |
| 6   | acetyl 11 $\alpha$ -methoxy- $\beta$ -boswellic acid         | $y = 57.58x + 22.848$  | 0.9957   | 0.2070~13.25                        |
| 7   | 3 $\alpha$ -hydroxy tirucall-7,24-dien-21-oic acid           | $y = 78.189x - 23.028$ | 0.9999   | 0.6062~38.80                        |
| 8   | 11-keto-boswellicacid                                        | $y = 1128.9x + 319.09$ | 0.9935   | 0.0203~20.80                        |
| 9   | 3-O-acetyl- $\alpha$ -boswellic acid                         | $y = 3.4072x - 1.536$  | 0.9911   | 0.8312~53.20                        |
| 10  | 3 $\alpha$ -acetyloxylanosta-8,24-dien-21-oic acid           | $y = 26.375x + 17.669$ | 0.9904   | 0.1719~44.00                        |
| 11  | 3 $\beta$ -acetoxy-5 $\alpha$ -lanosta-8,24-dien-21-oic acid | $y = 57.399x - 36.62$  | 0.9984   | 1.619~12.95                         |
| 12  | 3-acetyl-11-keto- $\beta$ -boswellic acid                    | $y = 851.08x + 294.9$  | 0.9962   | 0.7187~23.60                        |
| 13  | 3-acetyloxy-tirucall-8,24-dien-21-oic acid                   | $y = 1000.6x + 2582.6$ | 0.9921   | 0.2656~34.00                        |
| 14  | $\alpha$ -boswellicacid                                      | $y = 5.4652x - 6.311$  | 0.9968   | 0.0804~41.20                        |
| 15  | $\beta$ -boswellicacid                                       | $y = 11.778x + 46.189$ | 0.9906   | 0.7875~50.40                        |
